# Supplementary material
Source: Springer Nature journal article supplement (https://www.springermedizin.de/resource/supplementary/12913_2010_1583_MOESM1_ESM.pdf/9529328)

**0 - 1½ y**

**Foetus**

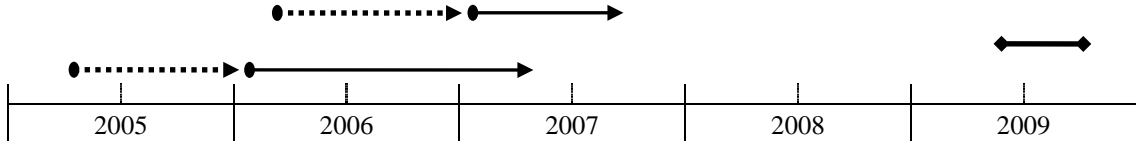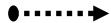

Intervention development

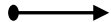

Implementation

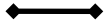

Follow up

Supplement: MOESM1 [file 9529328]
